# Supplementary material
Source: PubMed Central journal article supplement (PMC4531362)
Supplement: supp_tpc.15.00466_TPC2015-00466-RA_Supplemental_Data_FINAL.pdf [file supp_tpc.15.00466_TPC2015-00466-RA_Supplemental_Data_FINAL.pdf]

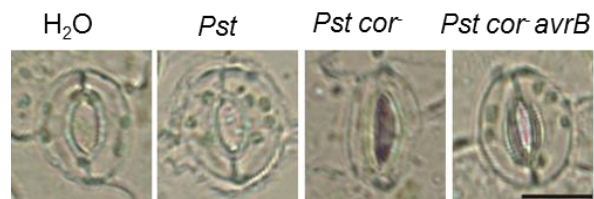

### Supplemental Figure 1. The *P. syringae* Effector Protein AvrB

**Complements the *cor*<sup>-</sup> Mutation in Stomatal Opening.** AvrB reopens closed stomata in the absence of COR. *rpm1 rps2* leaves were exposed to H<sub>2</sub>O, *Pst*, *Pst cor*<sup>-</sup> or *Pst cor*<sup>-</sup> *avrB*, and the stomata apertures were measured 4 h after treatment. Three independent experiments were performed with similar results and representative photographs are shown. Scale bar represents 10 μm.

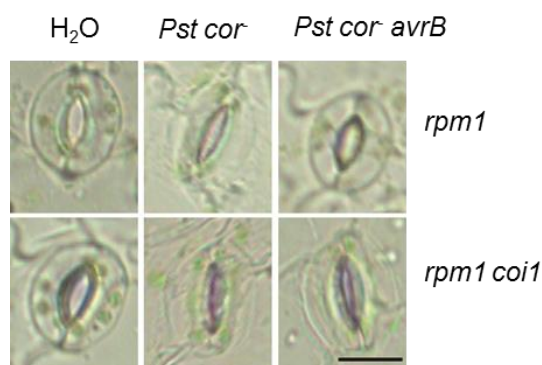

### Supplemental Figure 2. COI1 Is Required for *avrB*-Induced Stomatal

**Virulence.** *Pst cor*<sup>-</sup> *avrB* failed to open stomata in *rpm1 coi1*. The epidermal peels from *coi1* and *coi1 rpm1* plants were incubated in H<sub>2</sub>O, *Pst cor*<sup>-</sup> or *Pst cor*<sup>-</sup> *avrB* for ~4 h, and representative photographs were shown. Scale bar represents 10 μm.

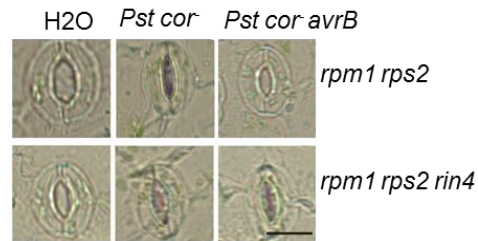

### Supplemental Figure 3. RIN4 Is Required for *avrB*-Induced Stomatal

**Opening.** *Pst cor avrB* does not re-open stomata in *rpm1 rps2 rin4* plants.

Epidermal peels of the indicated genotypes were incubated with H<sub>2</sub>O, *Pst cor*, or *Pst cor avrB* for 4 h, and representative photographs are shown. Scale bar represents 10  $\mu$ m.

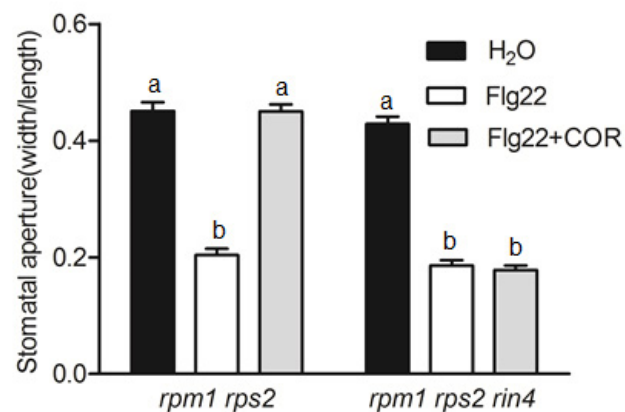

### Supplemental Figure 4. COR Re-opens Stomata in a *RIN4*-Dependent

**Manner.** Epidermal peels of the indicated genotypes were incubated in a buffer with or without 0.5 ng/ml COR and/or 5  $\mu$ M flg22 for 4 h, and stomatal apertures were measured. Error bars indicate standard error. Different letters denote significant differences at  $P \leq 0.01$  (*t*-test,  $n=3$ , 3 biological repeats).

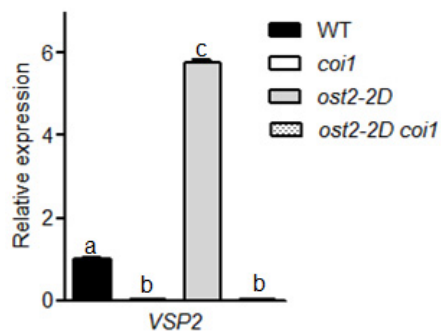

**Supplemental Figure 5. VSP2 Transcripts Were Up-Regulated in *ost2-2D***

**in a *COI1*-Dependent Manner.** The abundance of *VSP2* transcripts was examined in leaves of WT, *coi1*, *ost2-2D* or *ost2-2D coi1* using *ACTIN8* as the internal standard. Error bars indicate standard error. Different letters denote significant differences at  $P \leq 0.01$  (*t*-test,  $n=3$ , 3 biological repeats).

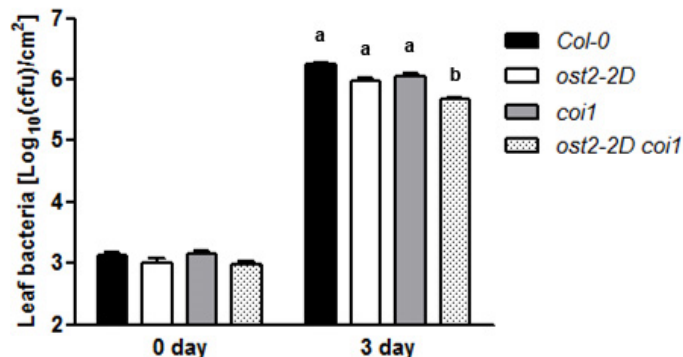

**Supplemental Figure 6. *ost2-2D* Lines Did Not Display Enhanced**

**Susceptibility to Syringe Inoculation with *Pst*.** Four-week-old Arabidopsis plants were inoculated by syringe infiltration *Pst* and bacterial counts in the leaf were determined 3 days post-inoculation. Error bars indicate standard error. Different letters denote significant differences at  $P \leq 0.01$  (*t*-test,  $n=11$ , 3 biological repeats).

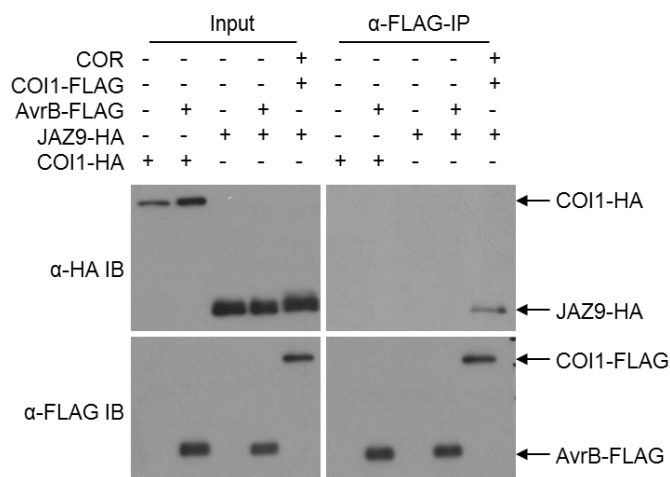

**Supplemental Figure 7. AvrB Does Not Interact with COI1 or JAZ9 in**

**Protoplasts.** *rpm1 rps2* protoplasts were transfected with the indicated plasmids and incubated for 12 h and a co-IP assay was performed using anti-FLAG beads. The COI-JAZ9 interaction induced by COR was included as a positive control.

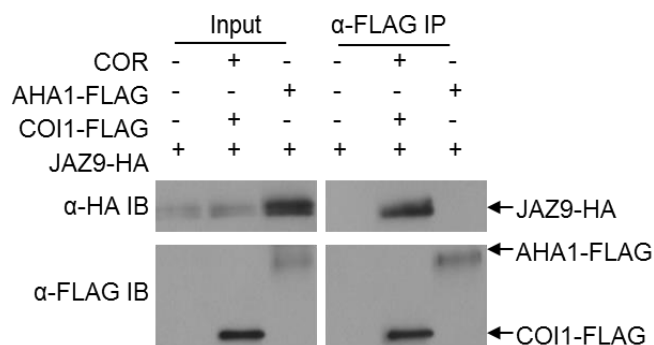

**Supplemental Figure 8. AHA1 Does Not Interact with JAZ9.** The indicated

constructs were expressed in wild-type protoplasts, and a co-IP assay was performed using anti-FLAG beads. The COI-JAZ9 interaction was included as a positive control.
